# Supplementary material for: Use of Nanostructured Silica SBA-15 as an Oral Vaccine Adjuvant to Control Mycoplasma hyopneumoniae in Swine Production
Source: MDPI journal article supplement (doi:10.3390/ijms24076591), 2023-04-01
Supplement: s1 [file s1]

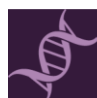

**Table S1.** Means  $\pm$  standard error of rectal temperature measurements recorded for groups 1 to 4 over the study period.

| Day | Rectal temperature ( $^{\circ}\text{C}$ ) <sup>1</sup> |                               |                               |                               | P value               |
|-----|--------------------------------------------------------|-------------------------------|-------------------------------|-------------------------------|-----------------------|
|     | G1                                                     | G2                            | G3                            | G4                            |                       |
| D3  | 38.96 $\pm$ 0.1                                        | 39.17 $\pm$ 0.08              | 38.99 $\pm$ 0.08              | 38.84 $\pm$ 0.07              | 6.02 $\times 10^{-2}$ |
| D4  | 39.01 $\pm$ 0.07                                       | 39.03 $\pm$ 0.05              | 39.06 $\pm$ 0.07 <sup>a</sup> | 38.8 $\pm$ 0.06 <sup>b</sup>  | 1.53 $\times 10^{-2}$ |
| D5  | 38.90 $\pm$ 0.09                                       | 39.03 $\pm$ 0.06              | 39.21 $\pm$ 0.11              | 38.95 $\pm$ 0.09              | 9.55 $\times 10^{-2}$ |
| D10 | 39.28 $\pm$ 0.19                                       | 39.14 $\pm$ 0.1               | 38.99 $\pm$ 0.12              | 38.88 $\pm$ 0.15              | 2.44 $\times 10^{-1}$ |
| D17 | 37.95 $\pm$ 0.11 <sup>b</sup>                          | 38.17 $\pm$ 0.1               | 38.34 $\pm$ 0.11              | 38.39 $\pm$ 0.12 <sup>a</sup> | 3.05 $\times 10^{-2}$ |
| D24 | 37.39 $\pm$ 0.16 <sup>b</sup>                          | 38.31 $\pm$ 0.12 <sup>a</sup> | 38.11 $\pm$ 0.16 <sup>a</sup> | 37.93 $\pm$ 0.09 <sup>a</sup> | 1.27 $\times 10^{-4}$ |
| D26 | 37.85 $\pm$ 0.07 <sup>b</sup>                          | 38.29 $\pm$ 0.12 <sup>a</sup> | 38.12 $\pm$ 0.1               | 38.33 $\pm$ 0.09 <sup>a</sup> | 7.30 $\times 10^{-3}$ |
| D31 | 37.85 $\pm$ 0.13 <sup>b</sup>                          | 38.29 $\pm$ 0.21 <sup>a</sup> | 38.12 $\pm$ 0.16              | 38.33 $\pm$ 0.23 <sup>a</sup> | 9.40 $\times 10^{-1}$ |
| D41 | 37.10 $\pm$ 0.15                                       | 37.32 $\pm$ 0.19              | 37.01 $\pm$ 0.11              | 37.41 $\pm$ 0.19              | 4.55 $\times 10^{-1}$ |
| D51 | 38.32 $\pm$ 0.15                                       | 38.33 $\pm$ 0.14              | 38.35 $\pm$ 0.14              | 37.84 $\pm$ 0.23              | 1.23 $\times 10^{-1}$ |
| D61 | 38.76 $\pm$ 0.13                                       | 38.37 $\pm$ 0.08              | 38.54 $\pm$ 0.15              | 38.64 $\pm$ 0.15              | 2.56 $\times 10^{-1}$ |
| D71 | 38.29 $\pm$ 0.19                                       | 38.19 $\pm$ 0.16              | 37.98 $\pm$ 0.23              | 38.37 $\pm$ 0.16              | 4.56 $\times 10^{-1}$ |

<sup>1</sup>Means followed by different letters in the same row differ significantly by Tukey's parametric test ( $p < 0.05$ ).

**Table S2.** P-values from multiple comparisons between rectal temperature measurements recorded over time

| Comparison | G1                    | G2                    | G3                     | G4                    |
|------------|-----------------------|-----------------------|------------------------|-----------------------|
| D3-D0      | 1.00 <sup>1</sup>     | 1.00                  | 1.00                   | 1.00                  |
| D5-D0      | 1.00                  | 1.00                  | 1.00                   | 1.00                  |
| D10-D0     | 1.00                  | 1.00                  | 1.00                   | 1.00                  |
| D17-D0     | 9.88 $\times 10^{-3}$ | 4.19 $\times 10^{-4}$ | 1.50 $\times 10^{-1}$  | 4.27 $\times 10^{-1}$ |
| D24-D0     | 9.16 $\times 10^{-6}$ | 1.53 $\times 10^{-2}$ | 4.61 $\times 10^{-3}$  | 1.60 $\times 10^{-3}$ |
| D26-D0     | 6.35 $\times 10^{-3}$ | 1.01 $\times 10^{-2}$ | 6.46 $\times 10^{-3}$  | 1.68 $\times 10^{-1}$ |
| D31-D0     | 3.85 $\times 10^{-4}$ | 1.75 $\times 10^{-7}$ | 4.40 $\times 10^{-6}$  | 5.16 $\times 10^{-4}$ |
| D41-D0     | 1.72 $\times 10^{-7}$ | 6.10 $\times 10^{-8}$ | 5.82 $\times 10^{-10}$ | 4.88 $\times 10^{-7}$ |
| D51-D0     | 6.14 $\times 10^{-1}$ | 1.08 $\times 10^{-2}$ | 8.14 $\times 10^{-2}$  | 5.80 $\times 10^{-3}$ |
| D61-D0     | 1.00                  | 1.53 $\times 10^{-2}$ | 6.86 $\times 10^{-1}$  | 9.53 $\times 10^{-1}$ |
| D71-D0     | 4.47 $\times 10^{-1}$ | 1.99 $\times 10^{-3}$ | 6.46 $\times 10^{-3}$  | 2.67 $\times 10^{-1}$ |
| D5-D3      | 1.00                  | 1.00                  | 1.00                   | 1.00                  |
| D10-D3     | 1.00                  | 1.00                  | 1.00                   | 1.00                  |
| D17-D3     | 2.52 $\times 10^{-3}$ | 1.45 $\times 10^{-3}$ | 1.23 $\times 10^{-1}$  | 5.95 $\times 10^{-1}$ |
| D24-D3     | 1.08 $\times 10^{-6}$ | 3.68 $\times 10^{-2}$ | 3.29 $\times 10^{-3}$  | 3.95 $\times 10^{-3}$ |
| D26-D3     | 1.38 $\times 10^{-3}$ | 2.42 $\times 10^{-2}$ | 4.61 $\times 10^{-3}$  | 2.80 $\times 10^{-1}$ |
| D31-D3     | 6.02 $\times 10^{-5}$ | 1.61 $\times 10^{-6}$ | 2.32 $\times 10^{-6}$  | 1.50 $\times 10^{-3}$ |
| D41-D3     | 5.75 $\times 10^{-8}$ | 2.54 $\times 10^{-7}$ | 3.01 $\times 10^{-10}$ | 1.07 $\times 10^{-5}$ |
| D51-D3     | 3.59 $\times 10^{-1}$ | 2.58 $\times 10^{-2}$ | 6.48 $\times 10^{-2}$  | 1.41 $\times 10^{-2}$ |
| D61-D3     | 9.99 $\times 10^{-1}$ | 3.68 $\times 10^{-2}$ | 6.31 $\times 10^{-1}$  | 9.87 $\times 10^{-1}$ |
| D71-D3     | 2.27 $\times 10^{-1}$ | 6.07 $\times 10^{-3}$ | 4.61 $\times 10^{-3}$  | 4.09 $\times 10^{-1}$ |
| D10-D5     | 9.98 $\times 10^{-1}$ | 1.00                  | 9.99 $\times 10^{-1}$  | 1.00                  |
| D17-D5     | 2.31 $\times 10^{-2}$ | 9.52 $\times 10^{-4}$ | 2.23 $\times 10^{-2}$  | 3.27 $\times 10^{-1}$ |

*Continues on the next page*

|         |                       |                       |                        |                       |
|---------|-----------------------|-----------------------|------------------------|-----------------------|
| D24-D5  | $3.55 \times 10^{-5}$ | $2.92 \times 10^{-2}$ | $2.57 \times 10^{-4}$  | $8.04 \times 10^{-4}$ |
| D26-D5  | $1.46 \times 10^{-2}$ | $1.79 \times 10^{-2}$ | $4.03 \times 10^{-4}$  | $1.15 \times 10^{-1}$ |
| D31-D5  | $1.19 \times 10^{-3}$ | $1.28 \times 10^{-6}$ | $1.76 \times 10^{-7}$  | $2.74 \times 10^{-4}$ |
| D41-D5  | $1.08 \times 10^{-6}$ | $3.05 \times 10^{-8}$ | $3.17 \times 10^{-12}$ | $1.61 \times 10^{-7}$ |
| D51-D5  | $7.69 \times 10^{-1}$ | $2.01 \times 10^{-2}$ | $9.96 \times 10^{-3}$  | $3.11 \times 10^{-3}$ |
| D61-D5  | 1.00                  | $2.92 \times 10^{-2}$ | $2.54 \times 10^{-1}$  | $9.08 \times 10^{-1}$ |
| D71-D5  | $6.14 \times 10^{-1}$ | $4.39 \times 10^{-3}$ | $4.03 \times 10^{-4}$  | $1.90 \times 10^{-1}$ |
| D17-D10 | $4.23 \times 10^{-4}$ | $5.58 \times 10^{-4}$ | $2.67 \times 10^{-1}$  | $6.49 \times 10^{-1}$ |
| D24-D10 | $7.06 \times 10^{-8}$ | $1.79 \times 10^{-2}$ | $1.24 \times 10^{-2}$  | $5.40 \times 10^{-3}$ |
| D26-D10 | $3.20 \times 10^{-4}$ | $1.19 \times 10^{-2}$ | $1.58 \times 10^{-2}$  | $3.27 \times 10^{-1}$ |
| D31-D10 | $7.99 \times 10^{-6}$ | $2.57 \times 10^{-6}$ | $3.47 \times 10^{-5}$  | $2.02 \times 10^{-3}$ |
| D41-D10 | $1.04 \times 10^{-9}$ | $4.13 \times 10^{-8}$ | $7.92 \times 10^{-9}$  | $4.92 \times 10^{-6}$ |
| D51-D10 | $1.59 \times 10^{-1}$ | $1.29 \times 10^{-2}$ | $1.60 \times 10^{-1}$  | $1.88 \times 10^{-2}$ |
| D61-D10 | $9.85 \times 10^{-1}$ | $1.79 \times 10^{-2}$ | $8.42 \times 10^{-1}$  | $9.93 \times 10^{-1}$ |
| D71-D10 | $8.75 \times 10^{-2}$ | $2.91 \times 10^{-3}$ | $1.58 \times 10^{-2}$  | $4.64 \times 10^{-1}$ |
| D24-D17 | $9.53 \times 10^{-1}$ | $9.99 \times 10^{-1}$ | $9.96 \times 10^{-1}$  | $8.00 \times 10^{-1}$ |
| D26-D17 | 1.00                  | 1.00                  | $9.98 \times 10^{-1}$  | 1.00                  |
| D31-D17 | 1.00                  | $9.85 \times 10^{-1}$ | $3.77 \times 10^{-1}$  | $6.32 \times 10^{-1}$ |
| D41-D17 | $6.69 \times 10^{-1}$ | $8.40 \times 10^{-1}$ | $9.96 \times 10^{-3}$  | $5.14 \times 10^{-2}$ |
| D51-D17 | $8.99 \times 10^{-1}$ | 1.00                  | 1.00                   | $9.40 \times 10^{-1}$ |
| D61-D17 | $5.51 \times 10^{-2}$ | $9.99 \times 10^{-1}$ | $9.99 \times 10^{-1}$  | $9.99 \times 10^{-1}$ |
| D71-D17 | $9.64 \times 10^{-1}$ | 1.00                  | $9.98 \times 10^{-1}$  | 1.00                  |
| D26-D24 | $9.76 \times 10^{-1}$ | 1.00                  | 1.00                   | $9.68 \times 10^{-1}$ |
| D31-D24 | 1.00                  | $6.11 \times 10^{-1}$ | $9.69 \times 10^{-1}$  | 1.00                  |
| D41-D24 | 1.00                  | $2.64 \times 10^{-1}$ | $2.40 \times 10^{-1}$  | $9.59 \times 10^{-1}$ |
| D51-D24 | $8.75 \times 10^{-2}$ | 1.00                  | 1.00                   | 1.00                  |
| D61-D24 | $2.35 \times 10^{-4}$ | 1.00                  | $7.38 \times 10^{-1}$  | $2.01 \times 10^{-1}$ |
| D71-D24 | $1.59 \times 10^{-1}$ | 1.00                  | 1.00                   | $9.17 \times 10^{-1}$ |
| D31-D26 | 1.00                  | $7.00 \times 10^{-1}$ | $9.53 \times 10^{-1}$  | $8.98 \times 10^{-1}$ |
| D41-D26 | $7.54 \times 10^{-1}$ | $3.40 \times 10^{-1}$ | $2.03 \times 10^{-1}$  | $1.79 \times 10^{-1}$ |
| D51-D26 | $8.42 \times 10^{-1}$ | 1.00                  | 1.00                   | $9.97 \times 10^{-1}$ |
| D61-D26 | $3.75 \times 10^{-2}$ | 1.00                  | $7.86 \times 10^{-1}$  | $9.68 \times 10^{-1}$ |
| D71-D26 | $9.33 \times 10^{-1}$ | 1.00                  | 1.00                   | 1.00                  |
| D41-D31 | $9.83 \times 10^{-1}$ | 1.00                  | $9.80 \times 10^{-1}$  | $9.91 \times 10^{-1}$ |
| D51-D31 | $4.10 \times 10^{-1}$ | $6.83 \times 10^{-1}$ | $5.39 \times 10^{-1}$  | 1.00                  |
| D61-D31 | $3.63 \times 10^{-3}$ | $6.11 \times 10^{-1}$ | $4.43 \times 10^{-2}$  | $1.07 \times 10^{-1}$ |
| D71-D31 | $5.76 \times 10^{-1}$ | $9.07 \times 10^{-1}$ | $9.53 \times 10^{-1}$  | $8.00 \times 10^{-1}$ |
| D51-D41 | $1.32 \times 10^{-2}$ | $3.24 \times 10^{-1}$ | $2.23 \times 10^{-2}$  | $8.40 \times 10^{-1}$ |
| D61-D41 | $5.84 \times 10^{-6}$ | $2.64 \times 10^{-1}$ | $2.61 \times 10^{-4}$  | $1.58 \times 10^{-3}$ |
| D71-D41 | $2.93 \times 10^{-2}$ | $6.11 \times 10^{-1}$ | $2.03 \times 10^{-1}$  | $1.07 \times 10^{-1}$ |
| D61-D51 | $9.08 \times 10^{-1}$ | 1.00                  | $9.95 \times 10^{-1}$  | $3.92 \times 10^{-1}$ |
| D71-D51 | 1.00                  | 1.00                  | 1.00                   | $9.85 \times 10^{-1}$ |
| D71-D61 | $8.00 \times 10^{-1}$ | 1.00                  | $7.86 \times 10^{-1}$  | $9.91 \times 10^{-1}$ |

<sup>1</sup> p-values for comparison between time-points by linear mixed effect model (p < 0.05).

**Table S3.** Medians  $\pm$  standard error of median of S/P of IgG recorded for groups 1 to 4 over the study period.

| S/P values for IgG anti - <i>M. hyopneumoniae</i> <sup>1</sup> |                              |                               |                              |                               |                        |
|----------------------------------------------------------------|------------------------------|-------------------------------|------------------------------|-------------------------------|------------------------|
| Day                                                            | G1                           | G2                            | G3                           | G4                            | P value                |
| D3                                                             | 1.69 $\pm$ 0.03 <sup>b</sup> | 0.6 $\pm$ 0.06 <sup>d</sup>   | 1.85 $\pm$ 0.04 <sup>a</sup> | 1.02 $\pm$ 0.09 <sup>c</sup>  | 1.52 $\times 10^{-10}$ |
| D10                                                            | 1.39 $\pm$ 0.03 <sup>a</sup> | 0.39 $\pm$ 0.06 <sup>b</sup>  | 1.54 $\pm$ 0.03 <sup>a</sup> | 0.78 $\pm$ 0.02 <sup>b</sup>  | 5.44 $\times 10^{-11}$ |
| D17                                                            | 1.61 $\pm$ 0.13 <sup>a</sup> | 0.4 $\pm$ 0.07 <sup>b</sup>   | 1.99 $\pm$ 0.06 <sup>a</sup> | 0.79 $\pm$ 0.14 <sup>b</sup>  | 3.77 $\times 10^{-9}$  |
| D24                                                            | 0.94 $\pm$ 0.06 <sup>a</sup> | 0.1 $\pm$ 0.05 <sup>b</sup>   | 1.58 $\pm$ 0.09 <sup>a</sup> | 0.41 $\pm$ 0.03 <sup>b</sup>  | 7.45 $\times 10^{-11}$ |
| D31                                                            | 1.29 $\pm$ 0.08 <sup>b</sup> | 0.17 $\pm$ 0.09 <sup>c</sup>  | 2.06 $\pm$ 0.09 <sup>a</sup> | 0.65 $\pm$ 0.04 <sup>c</sup>  | 7.30 $\times 10^{-11}$ |
| D41                                                            | 0.76 $\pm$ 0.06 <sup>b</sup> | -0.01 $\pm$ 0.03 <sup>d</sup> | 1.14 $\pm$ 0.06 <sup>a</sup> | 0.31 $\pm$ 0.02 <sup>c</sup>  | 1.31 $\times 10^{-10}$ |
| D51                                                            | 0.52 $\pm$ 0.05 <sup>b</sup> | 0.19 $\pm$ 0.05 <sup>c</sup>  | 0.86 $\pm$ 0.05 <sup>a</sup> | 0.23 $\pm$ 0.06 <sup>bc</sup> | 2.98 $\times 10^{-7}$  |
| D61                                                            | 0.43 $\pm$ 0.03              | 0.31 $\pm$ 0.09 <sup>b</sup>  | 0.61 $\pm$ 0.05 <sup>a</sup> | 0.22 $\pm$ 0.07 <sup>b</sup>  | 1.12 $\times 10^{-2}$  |
| D71                                                            | 0.39 $\pm$ 0.07              | 0.48 $\pm$ 0.08               | 0.58 $\pm$ 0.06              | 0.38 $\pm$ 0.09               | 2.61 $\times 10^{-1}$  |

<sup>1</sup> Medians followed by different letters on the same row differ significantly by Kruskal-Wallis test ( $p < 0.05$ ).

**Table S4.** P-values from multiple comparisons between anti - *M. hyopneumoniae* IgG S/P measurements recorded over time

| Comparisons | G1                    | G2                     | G3                     | G4                    |
|-------------|-----------------------|------------------------|------------------------|-----------------------|
| D71-D3      | 2.70 $\times 10^{-9}$ | 8.98 $\times 10^{-1}$  | 1.55 $\times 10^{-6}$  | 1.66 $\times 10^{-3}$ |
| D71-D10     | 1.36 $\times 10^{-4}$ | 9.99 $\times 10^{-1}$  | 1.50 $\times 10^{-3}$  | 1.16 $\times 10^{-1}$ |
| D71-D17     | 2.24 $\times 10^{-7}$ | 1.00                   | 3.00 $\times 10^{-10}$ | 4.96 $\times 10^{-1}$ |
| D71-D24     | 4.53 $\times 10^{-2}$ | 2.77 $\times 10^{-3}$  | 5.85 $\times 10^{-3}$  | 1.00                  |
| D71-D31     | 2.71 $\times 10^{-4}$ | 1.60 $\times 10^{-1}$  | 3.00 $\times 10^{-10}$ | 8.71 $\times 10^{-1}$ |
| D71-D41     | 7.26 $\times 10^{-1}$ | 2.25 $\times 10^{-6}$  | 3.22 $\times 10^{-1}$  | 8.98 $\times 10^{-1}$ |
| D71-D51     | 1.00                  | 5.56 $\times 10^{-2}$  | 9.69 $\times 10^{-1}$  | 9.79 $\times 10^{-1}$ |
| D71-D61     | 1.00                  | 9.69 $\times 10^{-1}$  | 1.00                   | 9.69 $\times 10^{-1}$ |
| D61-D3      | 2.70 $\times 10^{-9}$ | 2.16 $\times 10^{-1}$  | 3.99 $\times 10^{-7}$  | 1.05 $\times 10^{-5}$ |
| D61-D10     | 1.36 $\times 10^{-4}$ | 1.00                   | $\times 10^{-3}$       | 2.79 $\times 10^{-3}$ |
| D61-D17     | 2.24 $\times 10^{-7}$ | 9.91 $\times 10^{-1}$  | 4.49 $\times 10^{-10}$ | 3.72 $\times 10^{-2}$ |
| D61-D24     | 4.53 $\times 10^{-2}$ | 1.15 $\times 10^{-1}$  | 4.37 $\times 10^{-3}$  | 9.91 $\times 10^{-1}$ |
| D61-D31     | 2.71 $\times 10^{-4}$ | 8.40 $\times 10^{-1}$  | 4.49 $\times 10^{-10}$ | 1.86 $\times 10^{-1}$ |
| D61-D41     | 7.26 $\times 10^{-1}$ | 8.59 $\times 10^{-4}$  | 2.84 $\times 10^{-1}$  | 1.00                  |
| D61-D51     | 1.00                  | 5.90 $\times 10^{-1}$  | 9.57 $\times 10^{-1}$  | 1.00                  |
| D51-D3      | 1.51 $\times 10^{-7}$ | 2.46 $\times 10^{-4}$  | 2.12 $\times 10^{-4}$  | 1.05 $\times 10^{-5}$ |
| D51-D10     | 9.04 $\times 10^{-4}$ | 2.83 $\times 10^{-1}$  | 8.11 $\times 10^{-2}$  | 3.60 $\times 10^{-3}$ |
| D51-D17     | 4.72 $\times 10^{-6}$ | 9.71 $\times 10^{-2}$  | 1.05 $\times 10^{-6}$  | 4.55 $\times 10^{-2}$ |
| D51-D24     | 1.36 $\times 10^{-1}$ | 9.95 $\times 10^{-1}$  | 1.86 $\times 10^{-1}$  | 9.95 $\times 10^{-1}$ |
| D51-D31     | 1.51 $\times 10^{-3}$ | 1.00                   | 1.05 $\times 10^{-6}$  | 2.16 $\times 10^{-1}$ |
| D51-D41     | 9.21 $\times 10^{-1}$ | 3.62 $\times 10^{-1}$  | 9.57 $\times 10^{-1}$  | 1.00                  |
| D41-D3      | 8.11 $\times 10^{-5}$ | 1.45 $\times 10^{-10}$ | 3.04 $\times 10^{-2}$  | 1.00 $\times 10^{-6}$ |
| D41-D10     | 9.64 $\times 10^{-2}$ | 9.60 $\times 10^{-5}$  | 7.26 $\times 10^{-1}$  | 8.76 $\times 10^{-4}$ |
| D41-D17     | 2.54 $\times 10^{-3}$ | 8.25 $\times 10^{-6}$  | 7.58 $\times 10^{-4}$  | 1.52 $\times 10^{-2}$ |
| D41-D24     | 8.98 $\times 10^{-1}$ | 8.98 $\times 10^{-1}$  | 8.98 $\times 10^{-1}$  | 9.57 $\times 10^{-1}$ |
| D41-D31     | 1.36 $\times 10^{-1}$ | 1.60 $\times 10^{-1}$  | 7.58 $\times 10^{-4}$  | 9.73 $\times 10^{-2}$ |

Continues on the next page

|         |                       |                       |                       |                       |
|---------|-----------------------|-----------------------|-----------------------|-----------------------|
| D31-D3  | $5.91 \times 10^{-1}$ | $1.57 \times 10^{-3}$ | $9.86 \times 10^{-1}$ | $1.86 \times 10^{-1}$ |
| D31-D10 | 1.00                  | $5.43 \times 10^{-1}$ | $2.16 \times 10^{-1}$ | $9.21 \times 10^{-1}$ |
| D31-D17 | $9.57 \times 10^{-1}$ | $2.49 \times 10^{-1}$ | 1.00                  | 1.00                  |
| D31-D24 | $9.21 \times 10^{-1}$ | $9.41 \times 10^{-1}$ | $9.66 \times 10^{-2}$ | $7.67 \times 10^{-1}$ |
| D24-D3  | $3.04 \times 10^{-2}$ | $2.25 \times 10^{-6}$ | $6.37 \times 10^{-1}$ | $7.78 \times 10^{-4}$ |
| D24-D10 | $8.71 \times 10^{-1}$ | $3.00 \times 10^{-2}$ | 1.00                  | $6.75 \times 10^{-2}$ |
| D24-D17 | $2.17 \times 10^{-1}$ | $5.78 \times 10^{-3}$ | $9.66 \times 10^{-2}$ | $3.63 \times 10^{-1}$ |
| D17-D3  | $9.98 \times 10^{-1}$ | $8.05 \times 10^{-1}$ | $9.86 \times 10^{-1}$ | $5.43 \times 10^{-1}$ |
| D17-D10 | $9.79 \times 10^{-1}$ | 1.00                  | $2.16 \times 10^{-1}$ | $9.98 \times 10^{-1}$ |
| D10-D3  | $6.82 \times 10^{-1}$ | $4.96 \times 10^{-1}$ | $8.40 \times 10^{-1}$ | $9.41 \times 10^{-1}$ |

<sup>1</sup> p-values for comparison between time-points by Friedman test ( $p < 0.05$ ).

**Table S5.** Medians  $\pm$  standard error of median of S/P for IgA recorded for groups 1 to 4 over the study period.

| S/P values for IgA <sup>1</sup> |                   |                    |                   |                    |                       |
|---------------------------------|-------------------|--------------------|-------------------|--------------------|-----------------------|
| Day                             | G1                | G2                 | G3                | G4                 | P value               |
| D3                              | $0.32 \pm 0.1$    | $0.17 \pm 0.05$    | $0.3 \pm 0.06$    | $0.34 \pm 0.06$    | $3.09 \times 10^{-1}$ |
| D10                             | $0.08 \pm 0.03^a$ | $-0.03 \pm 0.09^b$ | $0.12 \pm 0.03^a$ | $-0.02 \pm 0.03^b$ | $2.19 \times 10^{-3}$ |
| D17                             | $0 \pm 0.02^b$    | $-0.02 \pm 0.02^b$ | $0.03 \pm 0.09$   | $0.08 \pm 0.08^a$  | $1.51 \times 10^{-2}$ |
| D24                             | $0.17 \pm 0.13^a$ | $0 \pm 0.05$       | $-0.02 \pm 0.05$  | $-0.09 \pm 0.04^b$ | $3.50 \times 10^{-2}$ |
| D31                             | $0.28 \pm 0.05^b$ | $0.44 \pm 0.06$    | $0.53 \pm 0.07^a$ | $0.29 \pm 0.07^b$  | $3.31 \times 10^{-3}$ |
| D41                             | $0.28 \pm 0.12$   | $0.28 \pm 0.14$    | $0.4 \pm 0.09$    | $0.37 \pm 0.13$    | $6.38 \times 10^{-1}$ |
| D51                             | $0.61 \pm 0.06$   | $0.62 \pm 0.07$    | $0.54 \pm 0.08$   | $0.44 \pm 0.15$    | $5.11 \times 10^{-1}$ |
| D61                             | $0.91 \pm 0.12^a$ | $0.99 \pm 0.12^a$  | $0.59 \pm 0.12^b$ | $0.97 \pm 0.24$    | $2.12 \times 10^{-2}$ |
| D71                             | $1.22 \pm 0.09$   | $1.08 \pm 0.15$    | $0.81 \pm 0.1^b$  | $1.81 \pm 0.23^a$  | $4.39 \times 10^{-2}$ |

<sup>1</sup> Medians followed by different letters on the same row differ significantly by Kruskal-Wallis test ( $p < 0.05$ ).

**Table S6.** P-values from multiple comparisons between anti - *M. hyopneumoniae* IgA S/P measurements recorded over time

| Comparisons | G1                     | G2                    | G3                    | G4                     |
|-------------|------------------------|-----------------------|-----------------------|------------------------|
| D71-D3      | $1.55 \times 10^{-3}$  | $4.44 \times 10^{-4}$ | $4.42 \times 10^{-3}$ | $8.14 \times 10^{-2}$  |
| D71-D10     | $6.69 \times 10^{-7}$  | $1.83 \times 10^{-6}$ | $2.60 \times 10^{-5}$ | $1.48 \times 10^{-9}$  |
| D71-D17     | $9.37 \times 10^{-11}$ | $2.12 \times 10^{-6}$ | $6.53 \times 10^{-6}$ | $6.32 \times 10^{-6}$  |
| D71-D24     | $5.97 \times 10^{-5}$  | $1.27 \times 10^{-5}$ | $9.10 \times 10^{-8}$ | $1.08 \times 10^{-10}$ |
| D71-D31     | $2.67 \times 10^{-3}$  | $1.86 \times 10^{-1}$ | $8.98 \times 10^{-1}$ | $4.60 \times 10^{-3}$  |
| D71-D41     | $3.65 \times 10^{-3}$  | $1.86 \times 10^{-1}$ | $3.62 \times 10^{-1}$ | $2.16 \times 10^{-1}$  |
| D71-D51     | $3.63 \times 10^{-1}$  | $9.79 \times 10^{-1}$ | $9.21 \times 10^{-1}$ | $5.90 \times 10^{-1}$  |
| D71-D61     | 1.00                   | 1.00                  | $9.69 \times 10^{-1}$ | $9.79 \times 10^{-1}$  |
| D61-D3      | $1.22 \times 10^{-2}$  | $2.13 \times 10^{-4}$ | $1.60 \times 10^{-1}$ | $6.37 \times 10^{-1}$  |
| D61-D10     | $1.27 \times 10^{-5}$  | $2.12 \times 10^{-6}$ | $3.46 \times 10^{-3}$ | $2.83 \times 10^{-6}$  |
| D61-D17     | $4.00 \times 10^{-8}$  | $1.64 \times 10^{-7}$ | $2.16 \times 10^{-3}$ | $1.61 \times 10^{-3}$  |
| D61-D24     | $6.72 \times 10^{-4}$  | $1.60 \times 10^{-5}$ | $4.63 \times 10^{-6}$ | $2.28 \times 10^{-6}$  |
| D61-D31     | $1.97 \times 10^{-2}$  | $1.16 \times 10^{-1}$ | 1.00                  | $1.36 \times 10^{-1}$  |

Continues on the next page

|         |                       |                       |                       |                       |
|---------|-----------------------|-----------------------|-----------------------|-----------------------|
| D61-D41 | $2.39 \times 10^{-2}$ | $1.16 \times 10^{-1}$ | $9.69 \times 10^{-1}$ | $8.71 \times 10^{-1}$ |
| D61-D51 | $7.26 \times 10^{-1}$ | $9.41 \times 10^{-1}$ | 1.00                  | $9.95 \times 10^{-1}$ |
| D51-D3  | $6.82 \times 10^{-1}$ | $3.02 \times 10^{-2}$ | $2.48 \times 10^{-1}$ | $9.86 \times 10^{-1}$ |
| D51-D10 | $2.95 \times 10^{-2}$ | $4.44 \times 10^{-4}$ | $7.41 \times 10^{-3}$ | $1.67 \times 10^{-4}$ |
| D51-D17 | $1.82 \times 10^{-4}$ | $2.13 \times 10^{-4}$ | $4.42 \times 10^{-3}$ | $3.72 \times 10^{-2}$ |
| D51-D24 | $2.16 \times 10^{-1}$ | $2.47 \times 10^{-3}$ | $2.60 \times 10^{-5}$ | $4.43 \times 10^{-5}$ |
| D51-D31 | $7.67 \times 10^{-1}$ | $8.40 \times 10^{-1}$ | 1.00                  | $6.37 \times 10^{-1}$ |
| D51-D41 | $8.05 \times 10^{-1}$ | $8.40 \times 10^{-1}$ | $9.91 \times 10^{-1}$ | 1.00                  |
| D41-D3  | 1.00                  | $7.26 \times 10^{-1}$ | $8.40 \times 10^{-1}$ | 1.00                  |
| D41-D10 | $7.67 \times 10^{-1}$ | $1.16 \times 10^{-1}$ | $1.36 \times 10^{-1}$ | $2.65 \times 10^{-3}$ |
| D41-D17 | $8.06 \times 10^{-2}$ | $6.75 \times 10^{-2}$ | $9.66 \times 10^{-2}$ | $1.86 \times 10^{-1}$ |
| D41-D24 | $9.91 \times 10^{-1}$ | $2.84 \times 10^{-1}$ | $1.47 \times 10^{-3}$ | $8.83 \times 10^{-4}$ |
| D41-D31 | 1.00                  | 1.00                  | $9.95 \times 10^{-1}$ | $9.41 \times 10^{-1}$ |
| D31-D3  | 1.00                  | $7.26 \times 10^{-1}$ | $2.84 \times 10^{-1}$ | $9.95 \times 10^{-1}$ |
| D31-D10 | $8.05 \times 10^{-1}$ | $1.16 \times 10^{-1}$ | $9.50 \times 10^{-3}$ | $1.60 \times 10^{-1}$ |
| D31-D17 | $9.74 \times 10^{-2}$ | $6.75 \times 10^{-2}$ | $5.55 \times 10^{-3}$ | $9.22 \times 10^{-1}$ |
| D31-D24 | $9.95 \times 10^{-1}$ | $2.84 \times 10^{-1}$ | $3.74 \times 10^{-5}$ | $8.14 \times 10^{-2}$ |
| D24-D3  | $9.98 \times 10^{-1}$ | $9.99 \times 10^{-1}$ | $2.16 \times 10^{-1}$ | $4.60 \times 10^{-3}$ |
| D24-D10 | $9.98 \times 10^{-1}$ | 1.00                  | $9.21 \times 10^{-1}$ | 1.00                  |
| D24-D17 | $5.43 \times 10^{-1}$ | 1.00                  | $9.57 \times 10^{-1}$ | $8.05 \times 10^{-1}$ |
| D17-D3  | $1.36 \times 10^{-1}$ | $9.41 \times 10^{-1}$ | $9.21 \times 10^{-1}$ | $4.05 \times 10^{-1}$ |
| D17-D10 | $9.41 \times 10^{-1}$ | 1.00                  | 1.00                  | $9.22 \times 10^{-1}$ |
| D10-D3  | $8.71 \times 10^{-1}$ | $9.79 \times 10^{-1}$ | $9.57 \times 10^{-1}$ | $1.23 \times 10^{-2}$ |

<sup>1</sup> p-values for comparison between time-points by Friedman test ( $p < 0.05$ ).
